# Supplementary material for: Multi-isotope analysis of bone collagen of Late Pleistocene ungulates reveals niche partitioning and behavioural plasticity of reindeer during MIS 3
Source: PubMed Central journal article supplement (PMC10514192; doi:10.1038/s41598-023-42199-7), 2023-09-21

**Supplementary Information: Multi-isotope analysis of bone collagen from Les Cottés, France, reveals niche partitioning and behavioural plasticity in Late Pleistocene ungulates**

**Kate Britton<sup>1,2\*</sup>, Elodie-Laure Jimenez<sup>1,3+</sup>, Mael Le Corre<sup>1+</sup>, Sylvain Renou<sup>4,5</sup>, William Rendu<sup>6,7</sup>, Michael P. Richards<sup>2,8</sup>, Jean-Jacques Hublin<sup>2,9</sup> and Marie Soressi<sup>10</sup>**

<sup>1</sup>Department of Archaeology, University of Aberdeen, Aberdeen, AB24 3UF, United Kingdom

<sup>2</sup>Department of Human Evolution, Max Planck Institute for Evolutionary Anthropology, 04103, Leipzig, Germany

<sup>3</sup>Royal Belgian Institute of Natural Sciences, 29 Vautier Street, 1000 Brussels, Belgium

<sup>4</sup>Hadès Archéologie, Agence Atlantique, 33100 Bordeaux, France

<sup>5</sup>PACEA, UMR 5199, CNRS, Université de Bordeaux, Ministère de la Culture et de la Communication (MCC), F-33400 Pessac, France

<sup>6</sup>ZooSCAN (IRL 2013) CNRS - IAET SB RAS, Novosibirsk, Russia,

<sup>7</sup>Institut Français des études sur l'Asie Centrale (IFEAC) - UAR 3140 (CNRS-MEAE), Bichkek Kyrgyzstan

<sup>8</sup>Department of Archaeology, Simon Fraser University, 8888 University Drive, Burnaby, BC, Canada V5A 1S6

<sup>9</sup>Collège de France, 11, place Marcelin Berthelot, 74005 Paris

<sup>10</sup>Faculty of Archaeology, Leiden University, 2333CC Leiden, Netherlands

\* [k.britton@abdn.ac.uk](mailto:k.britton@abdn.ac.uk)

+these authors contributed equally to this work

**Table S1** (see Excel File 'SI\_Table S1'):  $\delta^{13}\text{C}$ ,  $\delta^{15}\text{N}$  and  $\delta^{34}\text{S}$  data of *Bison*, *Equus* and *Rangifer* bone collagen samples from Les Cottés archaeological site.

This excel file includes all repeat  $\delta^{13}\text{C}$ ,  $\delta^{15}\text{N}$  and  $\delta^{34}\text{S}$  measurements of bone collagen samples from Les Cottés, measured at both the Max Planck Institute for Evolutionary Anthropology, Leipzig, (MPI) and the Scottish Universities Environmental Research Centre (SUERC). Includes %C, %N, %S, C:N, C:S and N:S, along with calculated means from duplicate, triplicate or quadruplicate measurements.

**Table S2:** Difference in  $\delta^{13}\text{C}$  between species (*Bison*, *Equus* and *Rangifer*) and between species by levels at Les Cottés, estimated with mixed linear models. *Bison* is the reference category for species and US02 for the site level. Significant effects (95% CI excluding 0) are indicated in bold.

| Variables                                                         | Estimate     | SE           | t-value      | 95% CI       |              |
|-------------------------------------------------------------------|--------------|--------------|--------------|--------------|--------------|
|                                                                   |              |              |              | Lower        | Upper        |
| Model : $\delta^{13}\text{C} \sim \text{Species}$                 |              |              |              |              |              |
| (Intercept)                                                       | -20.40       | 0.076        | -268.39      | -20.55       | -20.25       |
| <i>Equus</i>                                                      | <b>-0.25</b> | <b>0.106</b> | <b>-2.35</b> | <b>-0.46</b> | <b>-0.04</b> |
| <i>Rangifer</i>                                                   | <b>0.83</b>  | <b>0.092</b> | <b>9.04</b>  | <b>0.65</b>  | <b>1.01</b>  |
| Model : $\delta^{13}\text{C} \sim \text{Species} * \text{Levels}$ |              |              |              |              |              |
| (Intercept)                                                       | -20.19       | 0.211        | -95.79       | -20.60       | -19.77       |
| <i>Equus</i>                                                      | -0.56        | 0.327        | -1.72        | -1.21        | 0.08         |
| <i>Rangifer</i>                                                   | 0.43         | 0.227        | 1.88         | -0.02        | 0.87         |
| US04 (upper)                                                      | 0.31         | 0.293        | 1.07         | -0.27        | 0.89         |
| US04 (lower)                                                      | -0.39        | 0.243        | -1.59        | -0.87        | 0.09         |
| US06                                                              | -0.21        | 0.267        | -0.79        | -0.74        | 0.32         |
| US08                                                              | -0.29        | 0.242        | -1.21        | -0.77        | 0.18         |
| <i>Equus</i> :US04 (upper)                                        | -0.01        | 0.405        | -0.04        | -0.81        | 0.79         |
| <i>Rangifer</i> :US04 (upper)                                     | 0.08         | 0.324        | 0.24         | -0.56        | 0.72         |
| <i>Equus</i> :US04 (lower)                                        | 0.46         | 0.366        | 1.25         | -0.27        | 1.18         |
| <b><i>Rangifer</i>:US04 (lower)</b>                               | <b>0.75</b>  | <b>0.273</b> | <b>2.74</b>  | <b>0.21</b>  | <b>1.29</b>  |
| <i>Equus</i> :US06                                                | 0.21         | 0.426        | 0.49         | -0.63        | 1.05         |
| <b><i>Rangifer</i>:US06</b>                                       | <b>0.61</b>  | <b>0.310</b> | <b>1.97</b>  | <b>0.00</b>  | <b>1.23</b>  |
| <i>Equus</i> :US08                                                | 0.27         | 0.373        | 0.72         | -0.47        | 1.01         |
| <i>Rangifer</i> :US08                                             | 0.22         | 0.277        | 0.79         | -0.33        | 0.77         |

**Table S3:** Difference in  $\delta^{15}\text{N}$  between species (*Bison*, *Equus* and *Rangifer*) and between species by levels at Les Cottés, estimated with mixed linear models. *Bison* is the reference category for species and US02 for the site level. Significant effects (95% CI excluding 0) are indicated in bold.

| Variables                                                         | Estimate    | SE           | t-value     | 95% CI      |             |
|-------------------------------------------------------------------|-------------|--------------|-------------|-------------|-------------|
|                                                                   |             |              |             | Lower       | Upper       |
| Model : $\delta^{15}\text{N} \sim \text{Species}$                 |             |              |             |             |             |
| (Intercept)                                                       | 6.40        | 0.225        | 28.50       | 5.96        | 6.85        |
| <i>Equus</i>                                                      | -0.61       | 0.315        | -1.94       | -1.23       | 0.01        |
| <b><i>Rangifer</i></b>                                            | <b>0.97</b> | <b>0.272</b> | <b>3.56</b> | <b>0.43</b> | <b>1.50</b> |
| Model : $\delta^{15}\text{N} \sim \text{Species} * \text{Levels}$ |             |              |             |             |             |
| (Intercept)                                                       | 7.38        | 0.651        | 11.34       | 6.10        | 8.67        |
| <i>Equus</i>                                                      | -0.44       | 1.027        | -0.43       | -2.46       | 1.59        |
| <i>Rangifer</i>                                                   | 0.29        | 0.703        | 0.41        | -1.10       | 1.67        |
| US04 (upper)                                                      | -1.34       | 0.919        | -1.46       | -3.16       | 0.47        |
| US04 (lower)                                                      | -1.09       | 0.752        | -1.45       | -2.58       | 0.39        |
| US06                                                              | -0.35       | 0.824        | -0.42       | -1.97       | 1.28        |
| US08                                                              | -1.43       | 0.751        | -1.90       | -2.91       | 0.06        |
| <i>Equus</i> :US04 (upper)                                        | 0.52        | 1.277        | 0.41        | -2.00       | 3.04        |
| <i>Rangifer</i> :US04 (upper)                                     | 0.48        | 1.015        | 0.48        | -1.52       | 2.49        |
| <i>Equus</i> :US04 (lower)                                        | -0.72       | 1.149        | -0.63       | -2.99       | 1.55        |
| <i>Rangifer</i> :US04 (lower)                                     | 0.50        | 0.848        | 0.59        | -1.18       | 2.17        |
| <i>Equus</i> :US06                                                | -1.02       | 1.318        | -0.77       | -3.62       | 1.58        |
| <i>Rangifer</i> :US06                                             | 0.23        | 0.964        | 0.24        | -1.68       | 2.13        |
| <i>Equus</i> :US08                                                | 0.59        | 1.172        | 0.51        | -1.72       | 2.91        |
| <i>Rangifer</i> :US08                                             | 1.48        | 0.865        | 1.71        | -0.23       | 3.19        |

**Table S4:** Difference in  $\delta^{34}\text{S}$  between species (*Bison*, *Equus* and *Rangifer*) and between species by levels at Les Cottés, estimated with mixed linear models. *Bison* is the reference category for species and US02 for the site level. Significant effects (95% CI excluding 0) are indicated in bold.

| Variables                                                         | Estimate     | SE           | t-value      | 95% CI       |              |
|-------------------------------------------------------------------|--------------|--------------|--------------|--------------|--------------|
|                                                                   |              |              |              | Lower        | Upper        |
| Model : $\delta^{34}\text{S} \sim \text{Species}$                 |              |              |              |              |              |
| (Intercept)                                                       | 11.99        | 0.451        | 26.60        | 11.10        | 12.88        |
| <i>Equus</i>                                                      | -0.81        | 0.632        | -1.29        | -2.06        | 0.44         |
| <b><i>Rangifer</i></b>                                            | <b>-2.29</b> | <b>0.550</b> | <b>-4.16</b> | <b>-3.38</b> | <b>-1.20</b> |
| Model : $\delta^{34}\text{S} \sim \text{Species} * \text{Levels}$ |              |              |              |              |              |
| (Intercept)                                                       | 11.24        | 1.281        | 8.77         | 8.70         | 13.77        |
| <i>Equus</i>                                                      | -3.14        | 2.025        | -1.55        | -7.14        | 0.87         |
| <i>Rangifer</i>                                                   | -2.06        | 1.403        | -1.47        | -4.83        | 0.71         |
| US04 (upper)                                                      | -1.14        | 1.812        | -0.63        | -4.72        | 2.45         |
| US04 (lower)                                                      | 0.35         | 1.502        | 0.23         | -2.62        | 3.32         |
| US06                                                              | -0.14        | 1.621        | -0.09        | -3.34        | 3.06         |
| US08                                                              | 2.48         | 1.479        | 1.68         | -0.44        | 5.40         |
| <i>Equus</i> :US04 (upper)                                        | 4.22         | 2.521        | 1.68         | -0.76        | 9.21         |
| <i>Rangifer</i> :US04 (upper)                                     | 2.57         | 2.039        | 1.26         | -1.46        | 6.60         |
| <i>Equus</i> :US04 (lower)                                        | 2.42         | 2.282        | 1.06         | -2.09        | 6.93         |
| <i>Rangifer</i> :US04 (lower)                                     | 0.05         | 1.707        | 0.03         | -3.32        | 3.43         |
| <i>Equus</i> :US06                                                | 3.94         | 2.594        | 1.52         | -1.19        | 9.07         |
| <i>Rangifer</i> :US06                                             | 0.51         | 1.912        | 0.27         | -3.27        | 4.29         |
| <i>Equus</i> :US08                                                | 1.75         | 2.338        | 0.75         | -2.88        | 6.37         |
| <i>Rangifer</i> :US08                                             | -1.75        | 1.722        | -1.02        | -5.15        | 1.66         |

1 **Table S5:** Pairwise comparison of the estimates from the mixed linear models testing the differences in  $\delta^{13}\text{C}$ ,  $\delta^{15}\text{N}$  and  $\delta^{34}\text{S}$  between species considering all  
2 levels together (All Levels model : isotope value ~ species) and between species by level (isotope value ~ species \* levels). Significant differences are indicated  
3 in bold.

| Units        | Contrast                | $\delta^{13}\text{C}$ |              |            |               |                  | $\delta^{15}\text{N}$ |              |            |              |                  | $\delta^{34}\text{S}$ |              |            |             |                  |
|--------------|-------------------------|-----------------------|--------------|------------|---------------|------------------|-----------------------|--------------|------------|--------------|------------------|-----------------------|--------------|------------|-------------|------------------|
|              |                         | estimate              | SE           | df         | t-ratio       | p-value          | estimate              | SE           | df         | t-ratio      | p-value          | estimate              | SE           | df         | t-ratio     | p-value          |
| All Levels   | <i>Bison - Equus</i>    | 0.25                  | 0.108        | 125        | 2.32          | 0.06             | 0.61                  | 0.319        | 124        | 1.91         | 0.14             | 0.81                  | 0.640        | 117        | 1.27        | 0.42             |
|              | <i>Bison - Rangifer</i> | <b>-0.83</b>          | <b>0.093</b> | <b>125</b> | <b>-8.92</b>  | <b>&lt;0.001</b> | <b>-0.97</b>          | <b>0.275</b> | <b>124</b> | <b>-3.51</b> | <b>&lt;0.01</b>  | <b>2.29</b>           | <b>0.558</b> | <b>117</b> | <b>4.11</b> | <b>&lt;0.001</b> |
|              | <i>Equus - Rangifer</i> | <b>-1.08</b>          | <b>0.091</b> | <b>123</b> | <b>-11.80</b> | <b>&lt;0.001</b> | <b>-1.58</b>          | <b>0.272</b> | <b>124</b> | <b>-5.79</b> | <b>&lt;0.001</b> | <b>1.48</b>           | <b>0.551</b> | <b>117</b> | <b>2.68</b> | <b>0.02</b>      |
| US02         | <i>Bison - Equus</i>    | 0.56                  | 0.349        | 139        | 1.61          | 0.25             | 0.44                  | 1.097        | 138        | 0.40         | 0.92             | 3.14                  | 2.173        | 131        | 1.44        | 0.32             |
|              | <i>Bison - Rangifer</i> | -0.43                 | 0.242        | 145        | -1.76         | 0.19             | -0.29                 | 0.751        | 139        | -0.38        | 0.92             | 2.06                  | 1.506        | 131        | 1.37        | 0.36             |
|              | <i>Equus - Rangifer</i> | <b>-0.99</b>          | <b>0.282</b> | <b>134</b> | <b>-3.50</b>  | <b>&lt;0.001</b> | -0.72                 | 0.894        | 138        | -0.81        | 0.70             | -1.08                 | 1.792        | 131        | -0.60       | 0.82             |
| US04 (upper) | <i>Bison - Equus</i>    | 0.58                  | 0.256        | 134        | 2.25          | 0.07             | -0.08                 | 0.812        | 137        | -0.10        | 0.99             | -1.09                 | 1.612        | 131        | -0.67       | 0.78             |
|              | <i>Bison - Rangifer</i> | -0.51                 | 0.247        | 135        | -2.05         | 0.11             | -0.77                 | 0.782        | 138        | -0.99        | 0.59             | -0.51                 | 1.587        | 131        | -0.32       | 0.94             |
|              | <i>Equus - Rangifer</i> | <b>-1.08</b>          | <b>0.177</b> | <b>137</b> | <b>-6.12</b>  | <b>&lt;0.001</b> | -0.69                 | 0.558        | 138        | -1.23        | 0.44             | 0.58                  | 1.157        | 131        | 0.50        | 0.87             |
| US04 (lower) | <i>Bison - Equus</i>    | 0.11                  | 0.176        | 140        | 0.60          | 0.82             | 1.16                  | 0.552        | 138        | 2.10         | 0.09             | 0.72                  | 1.130        | 131        | 0.63        | 0.80             |
|              | <i>Bison - Rangifer</i> | <b>-1.18</b>          | <b>0.162</b> | <b>142</b> | <b>-7.24</b>  | <b>&lt;0.001</b> | -0.78                 | 0.507        | 139        | -1.55        | 0.27             | 2.01                  | 1.043        | 131        | 1.92        | 0.14             |
|              | <i>Equus - Rangifer</i> | <b>-1.28</b>          | <b>0.155</b> | <b>134</b> | <b>-8.29</b>  | <b>&lt;0.001</b> | <b>-1.94</b>          | <b>0.490</b> | <b>137</b> | <b>-3.97</b> | <b>&lt;0.001</b> | 1.29                  | 0.972        | 131        | 1.33        | 0.38             |
| US06         | <i>Bison - Equus</i>    | 0.35                  | 0.290        | 156        | 1.21          | 0.45             | 1.45                  | 0.882        | 141        | 1.65         | 0.23             | -0.80                 | 1.740        | 131        | -0.46       | 0.89             |
|              | <i>Bison - Rangifer</i> | <b>-1.04</b>          | <b>0.226</b> | <b>142</b> | <b>-4.60</b>  | <b>&lt;0.001</b> | -0.51                 | 0.704        | 139        | -0.73        | 0.75             | 1.55                  | 1.394        | 131        | 1.11        | 0.51             |
|              | <i>Equus - Rangifer</i> | <b>-1.39</b>          | <b>0.272</b> | <b>153</b> | <b>-5.11</b>  | <b>&lt;0.001</b> | <b>-1.97</b>          | <b>0.832</b> | <b>140</b> | <b>-2.36</b> | <b>0.05</b>      | 2.35                  | 1.644        | 131        | 1.43        | 0.33             |
| US08         | <i>Bison - Equus</i>    | 0.29                  | 0.192        | 137        | 1.53          | 0.28             | -0.16                 | 0.605        | 138        | -0.26        | 0.96             | 1.39                  | 1.255        | 131        | 1.11        | 0.51             |
|              | <i>Bison - Rangifer</i> | <b>-0.64</b>          | <b>0.170</b> | <b>134</b> | <b>-3.79</b>  | <b>&lt;0.001</b> | <b>-1.76</b>          | <b>0.539</b> | <b>137</b> | <b>-3.27</b> | <b>&lt;0.001</b> | <b>3.81</b>           | <b>1.071</b> | <b>131</b> | <b>3.55</b> | <b>0.00</b>      |
|              | <i>Equus - Rangifer</i> | <b>-0.94</b>          | <b>0.184</b> | <b>137</b> | <b>-5.09</b>  | <b>&lt;0.001</b> | <b>-1.61</b>          | <b>0.580</b> | <b>138</b> | <b>-2.77</b> | <b>0.02</b>      | 2.42                  | 1.209        | 131        | 2.00        | 0.12             |

4

5

6 **Table S6:** Changes over time in  $\delta^{13}\text{C}$ ,  $\delta^{15}\text{N}$  and  $\delta^{34}\text{S}$  for *Bison*. Linear and quadratic effects of the median  
7 age of the level were estimated using mixed linear models. Best models are indicated in bold with their  
8 AICc, as well as significant effects.

| model                                                   | AICc         | variable         | estimate     | se           | t-value      | 95% CI       |             |
|---------------------------------------------------------|--------------|------------------|--------------|--------------|--------------|--------------|-------------|
|                                                         |              |                  |              |              |              | lower        | upper       |
| <b><math>\delta^{13}\text{C} \sim \text{age}</math></b> | <b>-1.3</b>  | intercept        | -18.93       | 1.059        | -17.88       | -21.07       | -16.78      |
|                                                         |              | age              | 0.04         | 0.026        | 1.39         | -0.02        | 0.09        |
| $\delta^{13}\text{C} \sim \text{age} + \text{age}^2$    | -0.1         | intercept        | 0.03         | 18.079       | 0.00         | -36.47       | 36.65       |
|                                                         |              | age              | 0.98         | 0.894        | 1.09         | -0.83        | 2.79        |
|                                                         |              | age <sup>2</sup> | 0.01         | 0.011        | 1.05         | -0.01        | 0.03        |
| <b><math>\delta^{15}\text{N} \sim \text{age}</math></b> | <b>87.6</b>  | intercept        | 10.04        | 3.623        | 2.77         | 2.70         | 17.39       |
|                                                         |              | age              | 0.09         | 0.089        | 1.01         | -0.09        | 0.27        |
| $\delta^{15}\text{N} \sim \text{age} + \text{age}^2$    | 89.9         | intercept        | 17.90        | 62.002       | 0.29         | -107.81      | 143.48      |
|                                                         |              | age              | 0.48         | 3.068        | 0.16         | -5.74        | 6.69        |
|                                                         |              | age <sup>2</sup> | 0.00         | 0.038        | 0.13         | -0.07        | 0.08        |
| <b><math>\delta^{34}\text{S} \sim \text{age}</math></b> | <b>148.4</b> | intercept        | -3.03        | 7.477        | -0.41        | -18.21       | 12.14       |
|                                                         |              | <b>age</b>       | <b>-0.37</b> | <b>0.183</b> | <b>-2.01</b> | <b>-0.74</b> | <b>0.00</b> |
| $\delta^{34}\text{S} \sim \text{age} + \text{age}^2$    | 150.2        | intercept        | 125.10       | 126.335      | 0.99         | -131.26      | 381.46      |
|                                                         |              | age              | 5.98         | 6.255        | 0.96         | -6.71        | 18.68       |
|                                                         |              | age <sup>2</sup> | 0.08         | 0.077        | 1.02         | -0.08        | 0.23        |

9

10 **Table S7:** Changes over time in  $\delta^{13}\text{C}$ ,  $\delta^{15}\text{N}$  and  $\delta^{34}\text{S}$  for *Equus*. Linear and quadratic effects of the median  
11 age of the level were estimated using mixed linear models. Best models are indicated in bold with their  
12 AICc, as well as significant effects.

| model                                                                  | AICc         | variable               | estimate     | se           | t-value      | 95% CI       |              |
|------------------------------------------------------------------------|--------------|------------------------|--------------|--------------|--------------|--------------|--------------|
|                                                                        |              |                        |              |              |              | lower        | upper        |
| <b><math>\delta^{13}\text{C} \sim \text{age}</math></b>                | <b>-27.2</b> | intercept              | -19.38       | 1.060        | -18.28       | -21.53       | -17.24       |
|                                                                        |              | age                    | 0.03         | 0.026        | 1.19         | -0.02        | 0.09         |
| $\delta^{13}\text{C} \sim \text{age} + \text{age}^2$                   | -24.9        | intercept              | -22.67       | 20.281       | -1.12        | -63.74       | 18.39        |
|                                                                        |              | age                    | -0.13        | 1.001        | -0.13        | -2.16        | 1.90         |
|                                                                        |              | age <sup>2</sup>       | 0.00         | 0.012        | -0.16        | -0.03        | 0.02         |
| $\delta^{15}\text{N} \sim \text{age}$                                  | -6.3         | intercept              | 6.15         | 3.242        | 1.90         | -0.42        | 12.71        |
|                                                                        |              | age                    | 0.01         | 0.081        | 0.11         | -0.15        | 0.17         |
| <b><math>\delta^{15}\text{N} \sim \text{age} + \text{age}^2</math></b> | <b>-10.3</b> | intercept              | 153.08       | 55.895       | 2.74         | 39.92        | 266.23       |
|                                                                        |              | <b>age</b>             | <b>7.27</b>  | <b>2.759</b> | <b>2.64</b>  | <b>1.68</b>  | <b>12.85</b> |
|                                                                        |              | <b>age<sup>2</sup></b> | <b>0.09</b>  | <b>0.034</b> | <b>2.63</b>  | <b>0.02</b>  | <b>0.16</b>  |
| <b><math>\delta^{34}\text{S} \sim \text{age}</math></b>                | <b>113.0</b> | intercept              | -1.53        | 4.344        | -0.35        | -10.33       | 7.28         |
|                                                                        |              | <b>age</b>             | <b>-0.32</b> | <b>0.109</b> | <b>-2.93</b> | <b>-0.54</b> | <b>-0.10</b> |
| $\delta^{34}\text{S} \sim \text{age} + \text{age}^2$                   | 114.4        | intercept              | -93.77       | 78.678       | -1.19        | -253.24      | 65.71        |
|                                                                        |              | age                    | -4.88        | 3.887        | -1.26        | -12.76       | 3.00         |
|                                                                        |              | age <sup>2</sup>       | -0.06        | 0.048        | -1.17        | -0.15        | 0.04         |

13 **Table S8:** Changes over time in  $\delta^{13}\text{C}$ ,  $\delta^{15}\text{N}$  and  $\delta^{34}\text{S}$  for *Rangifer*. Linear and quadratic effects of the  
 14 median age of the level were estimated using mixed linear models. Best models are indicated in bold  
 15 with their AICc, as well as significant effects.

| model                                                                  | AICc         | variable               | estimate     | se           | t-value      | 95% CI       |              |
|------------------------------------------------------------------------|--------------|------------------------|--------------|--------------|--------------|--------------|--------------|
|                                                                        |              |                        |              |              |              | lower        | upper        |
| $\delta^{13}\text{C} \sim \text{age}$                                  | 35.6         | intercept              | -19.35       | 0.734        | -26.36       | -20.81       | -17.89       |
|                                                                        |              | age                    | 0.01         | 0.019        | 0.30         | -0.03        | 0.04         |
| <b><math>\delta^{13}\text{C} \sim \text{age} + \text{age}^2</math></b> | <b>22.1</b>  | intercept              | -64.94       | 10.780       | -6.02        | -86.40       | -43.47       |
|                                                                        |              | <b>age</b>             | <b>-2.29</b> | <b>0.542</b> | <b>-4.22</b> | <b>-3.37</b> | <b>-1.21</b> |
|                                                                        |              | <b>age<sup>2</sup></b> | <b>-0.03</b> | <b>0.007</b> | <b>-4.24</b> | <b>-0.04</b> | <b>-0.02</b> |
| $\delta^{15}\text{N} \sim \text{age}$                                  | 158.1        | intercept              | 6.35         | 2.042        | 3.11         | 2.28         | 10.41        |
|                                                                        |              | age                    | -0.03        | 0.052        | -0.50        | -0.13        | 0.08         |
| <b><math>\delta^{15}\text{N} \sim \text{age} + \text{age}^2</math></b> | <b>156.5</b> | intercept              | 71.31        | 33.138       | 2.15         | 5.35         | 137.28       |
|                                                                        |              | age                    | 3.24         | 1.666        | 1.95         | -0.07        | 6.56         |
|                                                                        |              | <b>age<sup>2</sup></b> | <b>0.04</b>  | <b>0.021</b> | <b>1.96</b>  | <b>0.00</b>  | <b>0.08</b>  |
| $\delta^{34}\text{S} \sim \text{age}$                                  | <b>283.4</b> | intercept              | 7.84         | 4.396        | 1.78         | -0.92        | 16.60        |
|                                                                        |              | age                    | -0.05        | 0.111        | -0.42        | -0.27        | 0.17         |
| $\delta^{34}\text{S} \sim \text{age} + \text{age}^2$                   | 285.6        | intercept              | -21.08       | 72.837       | -0.29        | -166.25      | 124.14       |
|                                                                        |              | age                    | -1.50        | 3.656        | -0.41        | -8.79        | 5.79         |
|                                                                        |              | age <sup>2</sup>       | -0.02        | 0.046        | -0.40        | -0.11        | 0.07         |

16

17 **Table S9:** Percentage of overlap between the isotopic niches of *Rangifer*, *Bison* and *Equus* defined  
 18 within the  $\delta^{13}\text{C} - \delta^{15}\text{N}$  isotopic space. TA (Total Area) corresponds to the convex hull area encompassing  
 19 all the data of a given species. SEAc (Standard Ellipse Area corrected for small sample size) refers the  
 20 core niche area. Low overlap (<30%) is indicated in italic, and high overlap (>60%) in bold.

| Unit         | Species 1       | Species 2    | % of TA overlap |              | % of SEAc overlap |              |
|--------------|-----------------|--------------|-----------------|--------------|-------------------|--------------|
|              |                 |              | sp.1 by sp.2    | sp.2 by sp.1 | sp.1 by sp.2      | sp.2 by sp.1 |
| All Levels   | <i>Rangifer</i> | <i>Bison</i> | 48.3            | <b>67.9</b>  | 0                 | 0            |
|              | <i>Rangifer</i> | <i>Equus</i> | 26.5            | 46.7         | 0                 | 0            |
|              | <i>Bison</i>    | <i>Equus</i> | 51.2            | <b>64.2</b>  | 48.6              | 55.9         |
| US02         | <i>Rangifer</i> | <i>Bison</i> | <i>1.0</i>      | <i>1.6</i>   | <i>2.4</i>        | <i>0.4</i>   |
| US04 (upper) | <i>Rangifer</i> | <i>Bison</i> | 12.3            | 23.3         | 47.6              | 11.5         |
|              | <i>Rangifer</i> | <i>Equus</i> | 12.9            | 8.8          | 0                 | 0            |
|              | <i>Bison</i>    | <i>Equus</i> | 53.8            | 19.5         | 37.3              | <b>76.1</b>  |
| US04 (lower) | <i>Rangifer</i> | <i>Bison</i> | 0               | 0            | 0                 | 0            |
|              | <i>Rangifer</i> | <i>Equus</i> | 0               | 0            | 0                 | 0            |
|              | <i>Bison</i>    | <i>Equus</i> | <b>64.7</b>     | 33.6         | 37.3              | 24.5         |
| US06         | <i>Rangifer</i> | <i>Bison</i> | 0               | 0            | 0                 | 0            |
|              | <i>Rangifer</i> | <i>Equus</i> | 0               | 0            | 0                 | 0            |
|              | <i>Bison</i>    | <i>Equus</i> | <i>6.0</i>      | <i>11.4</i>  | 44.2              | 33.2         |
| US08         | <i>Rangifer</i> | <i>Bison</i> | 30.1            | <b>69.5</b>  | 9.1               | 20.3         |
|              | <i>Rangifer</i> | <i>Equus</i> | 5.7             | 22.9         | 0                 | 0            |
|              | <i>Bison</i>    | <i>Equus</i> | 41.6            | <b>72.8</b>  | 41.9              | 50.6         |

21

22

23 **Figure S1:** Differences in a)  $\delta^{13}\text{C}$ , b)  $\delta^{15}\text{N}$ , c)  $\delta^{34}\text{S}$  between species (*Bison*, *Equus*, *Rangifer*) at Les  
24 Cottés.

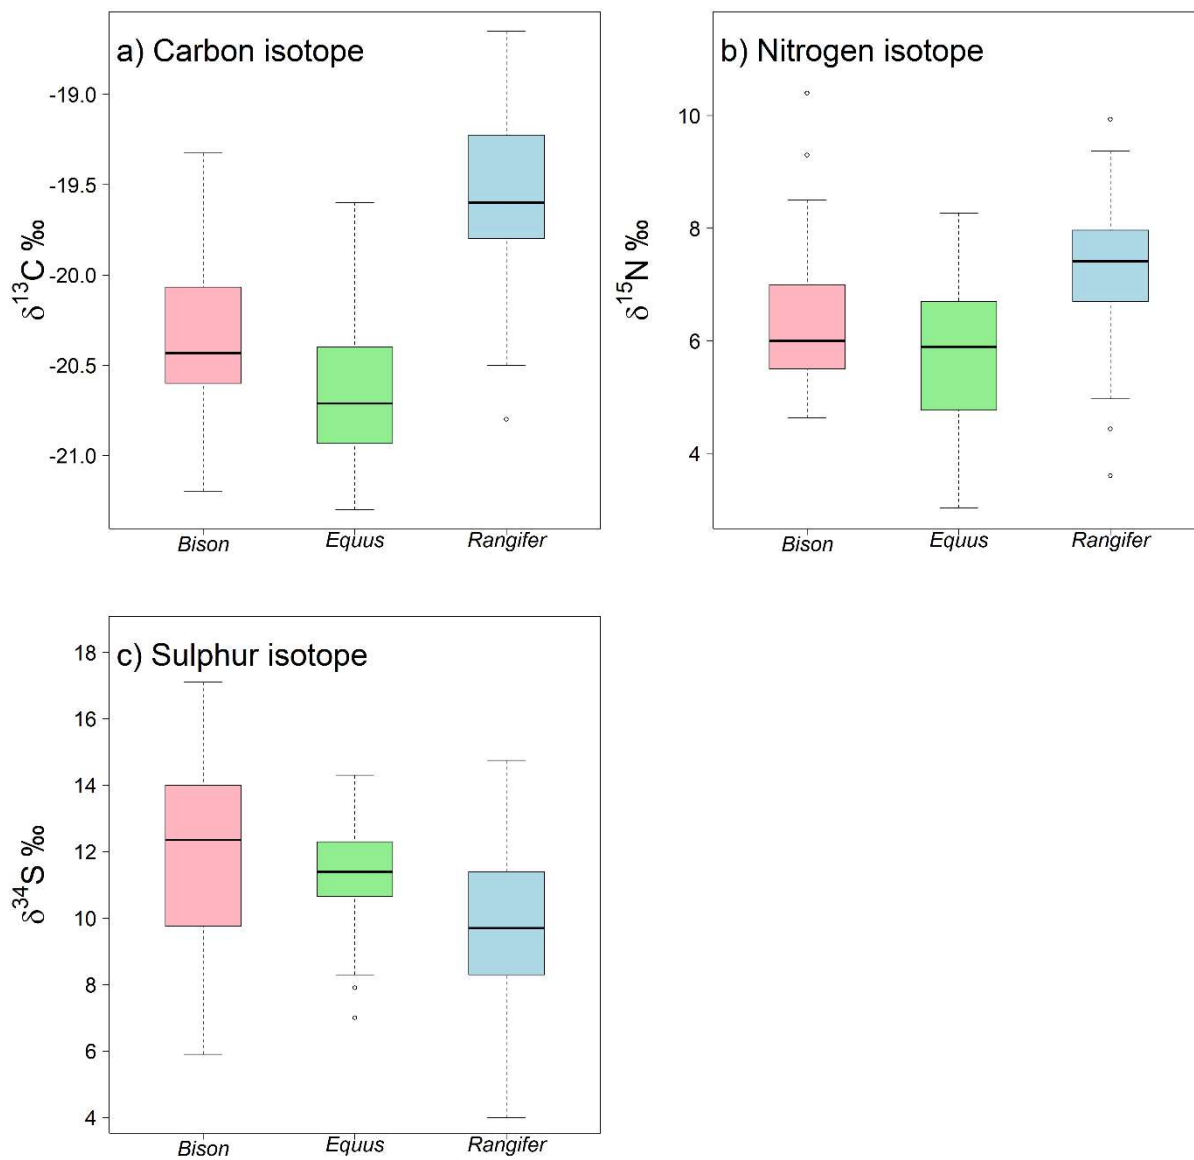

25

26



27 **Figure S2:** Box plots of a) carbon and c) nitrogen data from ungulate bone collagen generated at the  
 28 Max Planck Institute, Leipzig (MPI) and b) carbon and d) nitrogen data generated at the Scottish  
 29 Universities Research Centre (SUERC) from the same bone samples. Box plots show the median isotope  
 30 values, quartiles and outliers for each species by level.

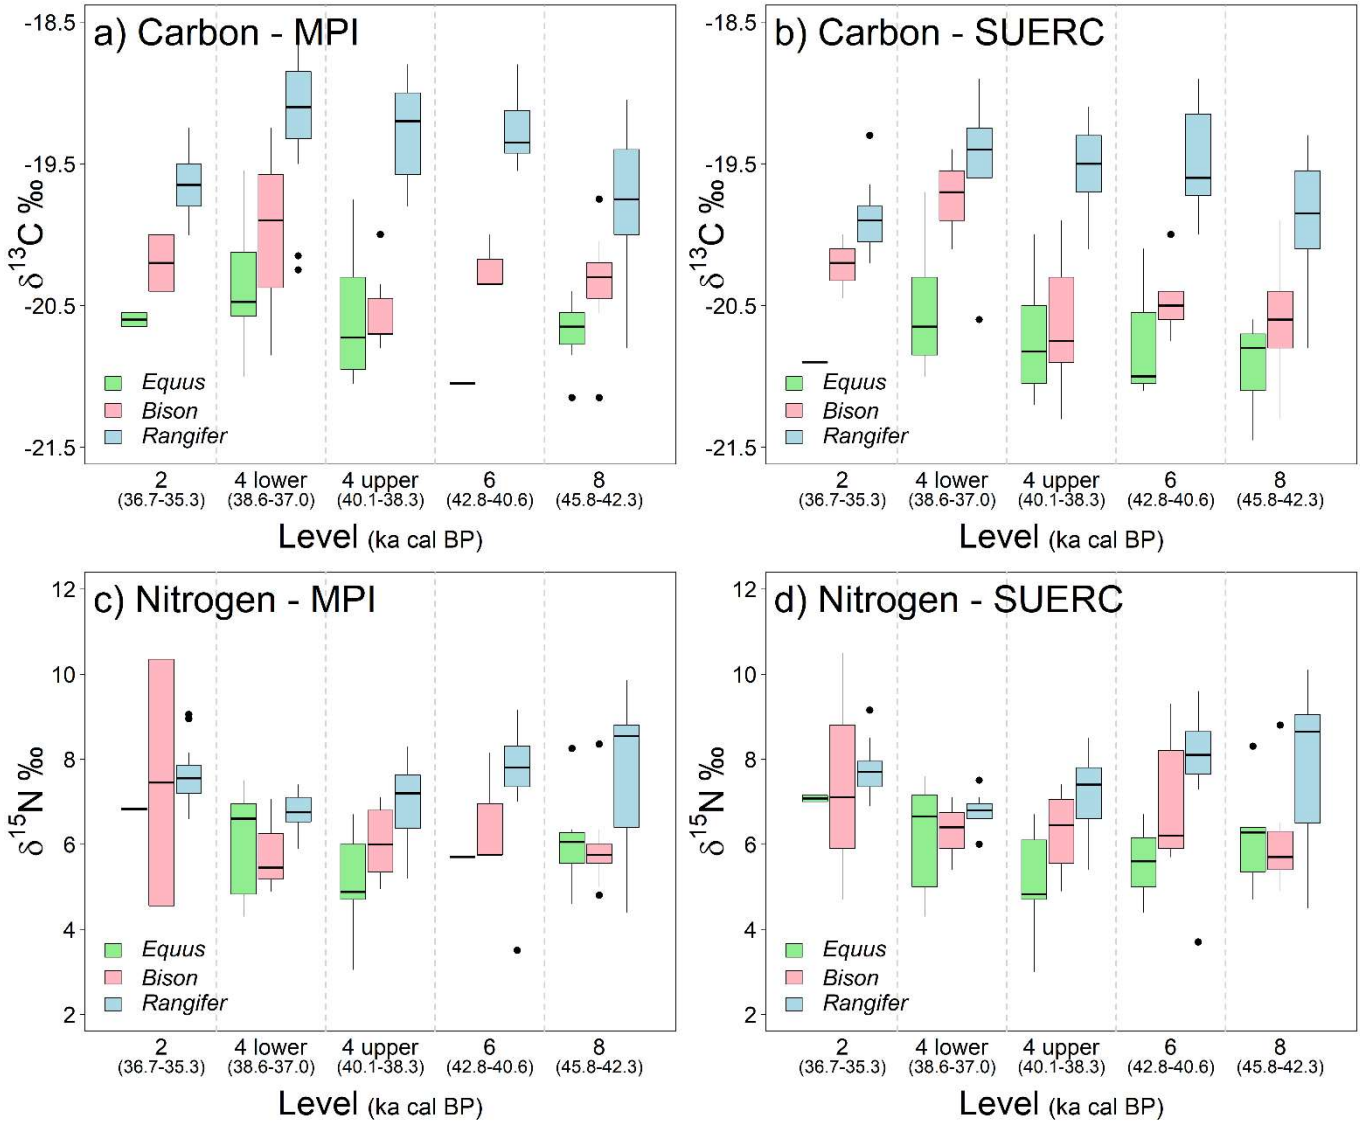

Supplement: 41598_2023_42199_MOESM1_ESM.pdf [file 41598_2023_42199_MOESM1_ESM.pdf]
